# Supplementary material for: Nutritional Composition and Volatile Compounds of Black Cumin (Nigella sativa L.) Seed, Fatty Acid Composition and Tocopherols, Polyphenols, and Antioxidant Activity of Its Essential Oil
Source: MDPI journal article supplement (doi:10.3390/horticulturae8070575), 2022-06-24
Supplement: s1 [file s1]

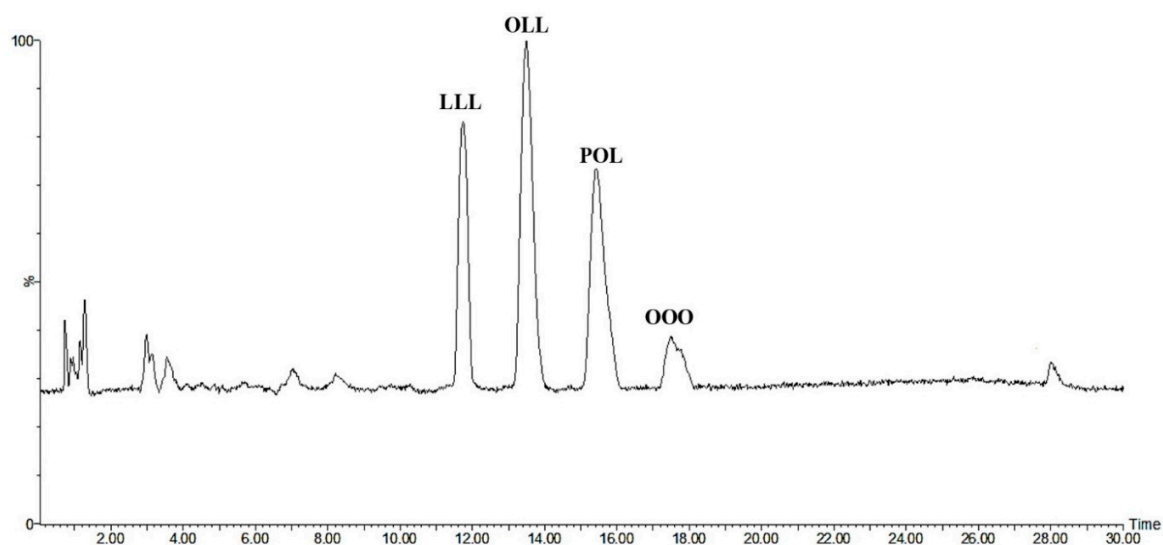

**Figure S1.** HPLC Chromatogram of triacylglycerol of black seed oil using Soxhlet method.

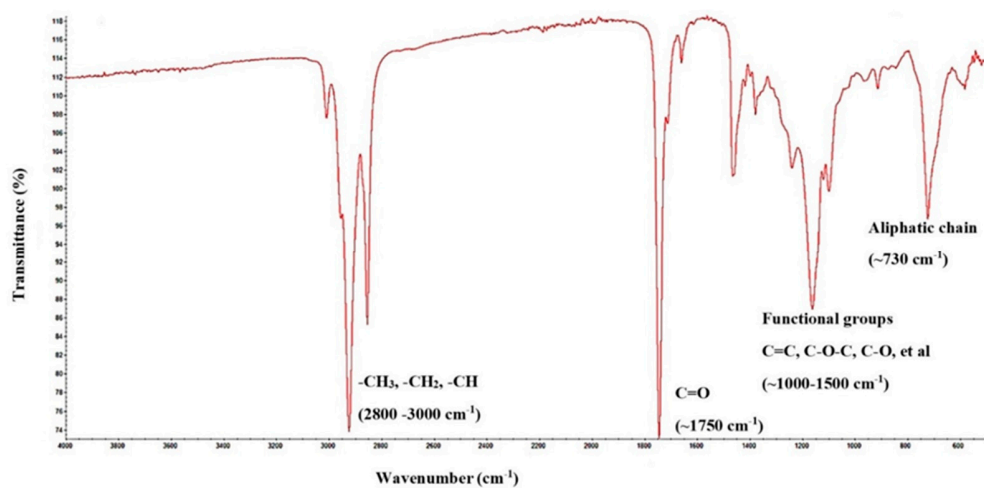

**Figure S2.** Spectroscopic bands were obtained from black seed oil.
